# Supplementary material for: Exposure of V sites on InVO 4 via rapid Joule-heating for highly efficient photocatalytic N 2 fixation
Source: Royal Society of Chemistry journal article supplement (doi:10.1039/d5qi02294k), 2025-12-20
Supplement: d5qi02294k1.pdf [file d5qi02294k1.pdf]

## ***Supporting Information***

### Exposure of V Sites on InVO<sub>4</sub> via Rapid Joule-Heating for Highly Efficient Photocatalytic N<sub>2</sub> Fixation

Qianyu Chu<sup>1</sup>, Guangmin Ren<sup>3</sup>, Jingdan Zhao<sup>1</sup>, Xiangchao Meng<sup>1</sup>, Jie Meng<sup>2\*</sup> and

Zizhen Li<sup>1\*</sup>

*<sup>1</sup>Key Laboratory of Marine Chemistry Theory and Technology (Ministry of Education), College of Chemistry & Chemical Engineering, Ocean University of China, Qingdao, Shandong, 266100, China.*

*<sup>2</sup>School of Mathematical Sciences, Ocean University of China, Qingdao 266100, China*

*<sup>3</sup>State Key Laboratory Base of Eco-Chemical Engineering, College of Chemical Engineering, Qingdao University of Science & Technology, Qingdao, 266042, China*

*\*Corresponding author*

*E-mail: mengjie@ouc.edu.cn (J.M.); lizizhen@ouc.edu.cn (Z.L.)*

## **Experimental Section**

### **Characterizations**

The X-ray diffraction (XRD) patterns were collected on a Rigaku Miniflex 600. The morphology of the prepared samples was shown on a Hitachi S-4800 field emission scanning electron microscope (SEM). Transmission electron microscopy (TEM) was obtained using a scanning electron microscope (FE-SEM SU-8010) and a transmission electron microscope (TEM, Talos-F200X). Electron paramagnetic resonance (EPR) spectra were obtained on a Bruker-A300/E500. X-ray photoelectron spectroscopy (XPS) data were obtained using a Thermo Fisher Scientific-ESCALAB 250Xi. In situ X-ray photoelectron spectroscopy (In situ XPS) data were obtained using a Thermo Scientific ESCALAB 250Xi. The UV-Vis diffuse reflectance spectra (DRS) were obtained by measurement using a PUXI TU-1901 spectrometer with BaSO<sub>4</sub> as a reference. Thermogravimetry (Netzsch STA449F3) was used to study the weight loss of a sample as a function of temperature. The in situ DRFT-IR spectra were recorded using an in situ FTIR spectrometer (Thermo iS50FT-IR) equipped with an MCT detector and a specially designed reaction cell.

### **Electrochemical measurements**

Photoelectrochemistry experiments use a 300 W xenon lamp as the light source. Transient photocurrent response measurements and electrochemical impedance spectroscopy (EIS) of samples were measured using the CHI 660E electrochemical workstation. Measurements were performed using a three-electrode system (reference electrode (saturated calomel electrode), counter electrode (graphite electrode), and working electrode) in 0.5 mol/L Na<sub>2</sub>SO<sub>4</sub> solution. The working electrode was prepared as follows: 10 mg of catalyst was dispersed in a mixture of 200 ml of deionized water and 20  $\mu$ l of Nafion, and then the suspension was applied on a clean FTO conductive glass (1  $\times$  1 cm) to dry naturally.

## The DFT calculation details

In order to reveal the mechanism of NRR on the surface of  $\text{InVO}_4\text{-JH}$ , the first principle calculations were performed, by using the projector augmented wave pseudopotentials and Perdew-Burke-Ernzerhof exchange-correlation as implemented in the Vienna ab initio simulation package (VASP)<sup>[1, 2]</sup>. The generalized gradient approximation method of Perdew-Burke-Ernzerhof (PBE) functional was used to describe the exchange-related interaction between electrons<sup>[3]</sup>. A  $3 \times 3 \times 1$   $\text{InVO}_4$  super-cell is adopted for slab modeling and the (1 1 2) plane was denoted as  $\text{InVO}_4$  (1 1 2). Then, a vacuum of 15 Å width was added in the direction normal to the surfaces. The O atom is removed based on  $\text{InVO}_4$  (1 1 2) to further simulate the oxygen-vacancy  $\text{InVO}_4\text{-JH}$ . The convergence criteria for the total energy and the Hellmann-Feynman force were 10<sup>-5</sup> eV and 0.02 eV, respectively. For energy calculations, the Brillouin zone was sampled with a  $3 \times 3 \times 1$  Gamma-center k-point mesh. The Gibbs free-energy change for the relevant elemental steps was calculated by a computational hydrogen electrode model, which can also be obtained by  $\Delta G = \Delta E + \Delta E_{\text{ZPE}} - T\Delta S$ , where  $\Delta E$  is the total energy,  $\Delta E_{\text{ZPE}}$  is the zero-point energy and S is the entropy at 298.15 K. Zero-point energy corrections and entropic contributions to the free energies (T=298.15 K).

## Figures

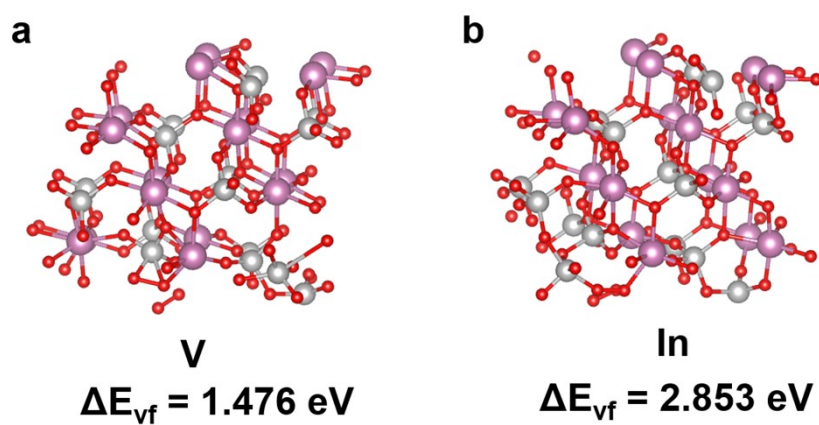

Figure S1. Oxygen vacancy formation energies in indium vanadate for (a) V, (b) In.

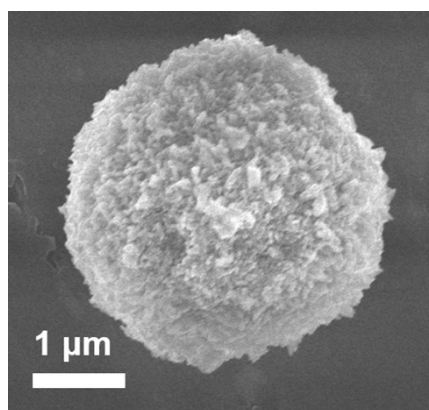

Figure S2. SEM image of primary InVO<sub>4</sub>.

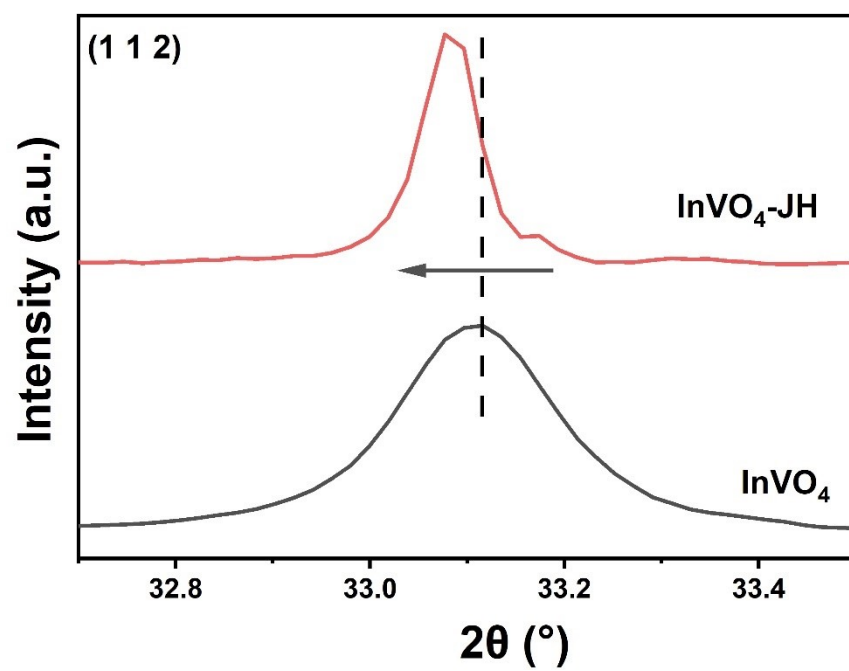

Figure S3. XRD partial enlargement of the (1 1 2) main peak for  $\text{InVO}_4$  and  $\text{InVO}_4\text{-JH}$ .

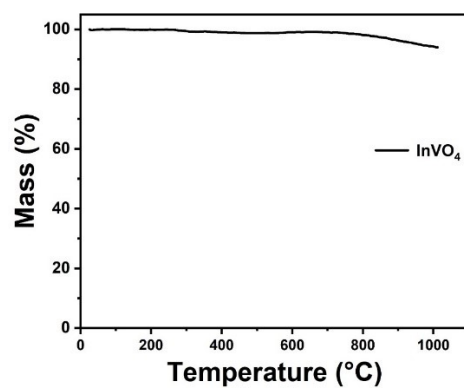

Figure S4. TGA curves of  $\text{InVO}_4$ .

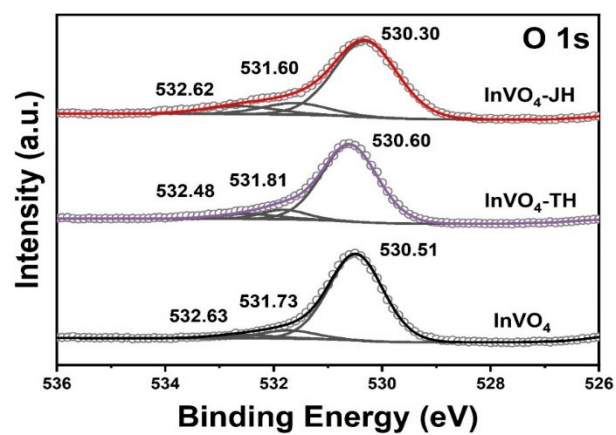

Figure S5. XPS spectra of O 1s in InVO<sub>4</sub>, InVO<sub>4</sub>-TH and InVO<sub>4</sub>-JH.



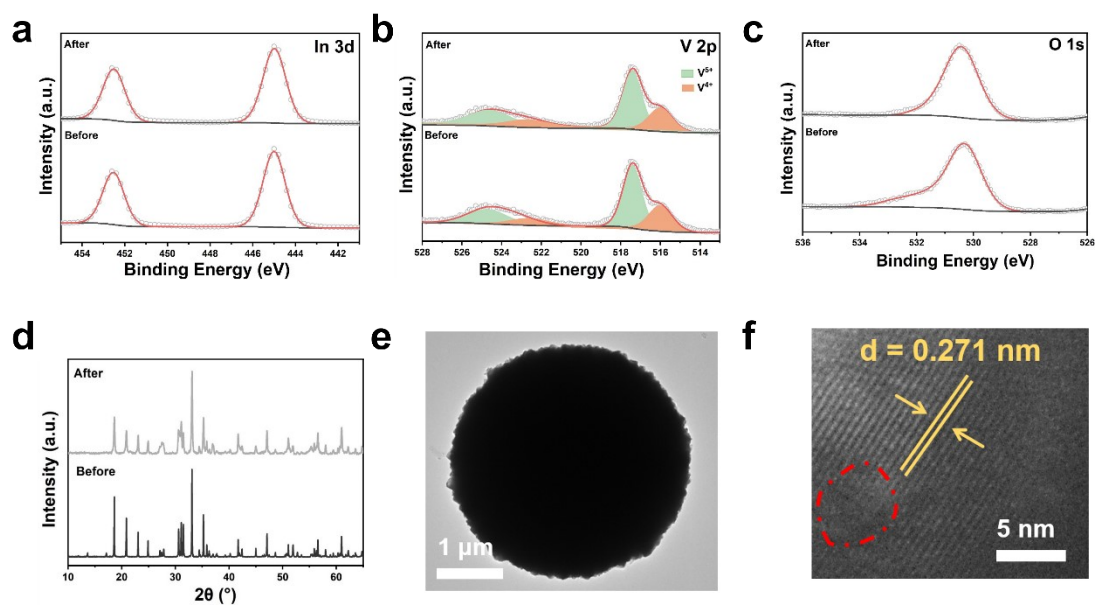

Figure S6. Reacted  $\text{InVO}_4\text{-JH}$  XPS spectra of (a)  $\text{In } 3d$ , (b)  $\text{V } 2p$ , (c)  $\text{O } 1s$ , (d) XRD, (e-f) TEM.

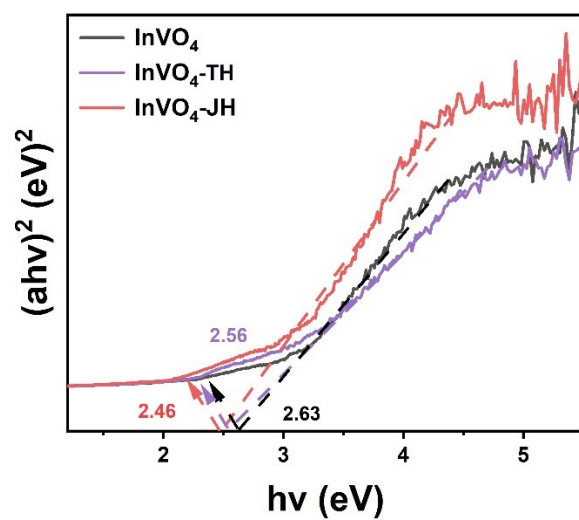

Figure S7. Tauc plots of  $(ah\nu)^2$  versus energy ( $h\nu$ ) of  $\text{InVO}_4$ ,  $\text{InVO}_4\text{-TH}$  and  $\text{InVO}_4\text{-JH}$ .

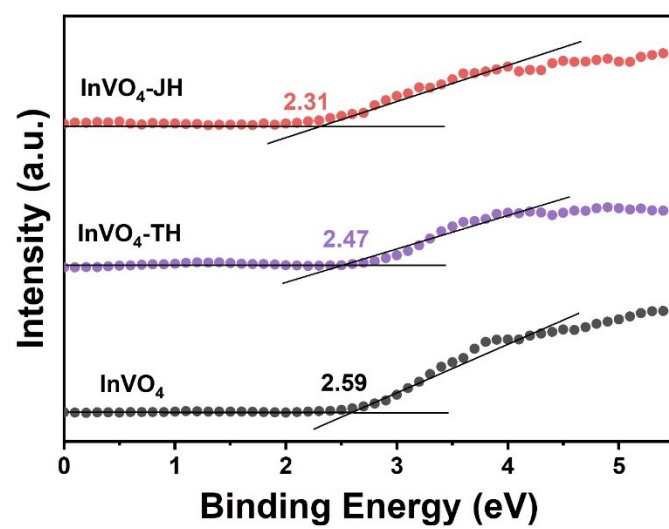

Figure S8. XPS valence spectra of InVO<sub>4</sub>, InVO<sub>4</sub>-TH and InVO<sub>4</sub>-JH.

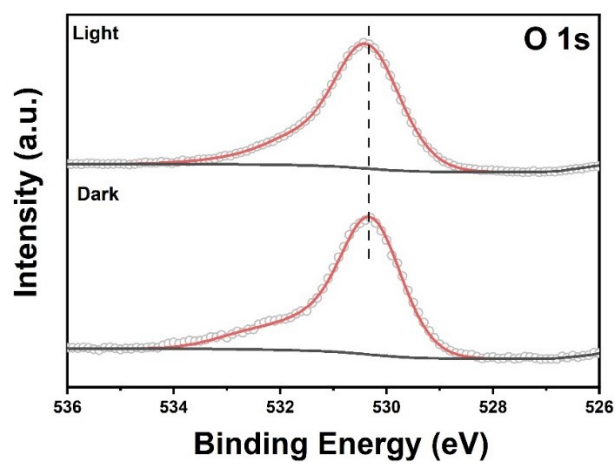

Figure S9. In-situ XPS spectra of InVO<sub>4</sub>-JH for O 1s.

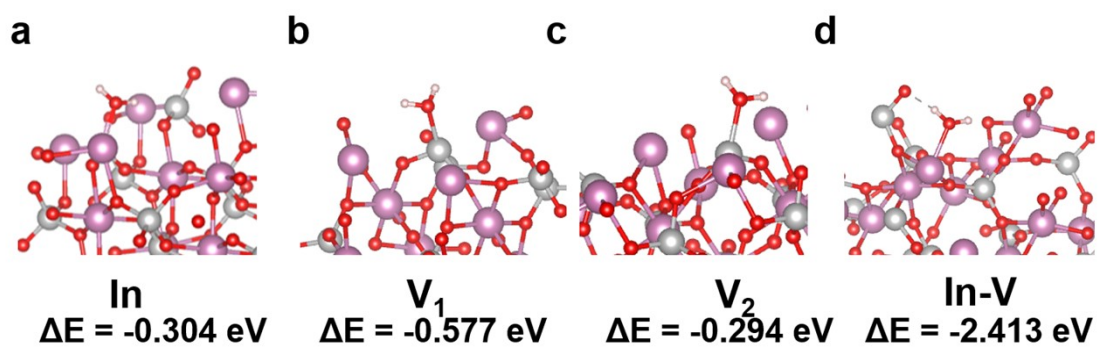

Figure S10. Adsorption energy of water molecules at different sites in InVO<sub>4</sub>.

**Table S1.** Compositional analysis from V 2p spectra.

| Photocatalyst         | Constituents Present in % |                 | Ratio                            |
|-----------------------|---------------------------|-----------------|----------------------------------|
|                       | V <sup>5+</sup>           | V <sup>4+</sup> | V <sup>4+</sup> /V <sup>5+</sup> |
| InVO <sub>4</sub>     | 90.05                     | 9.95            | 0.11                             |
| InVO <sub>4</sub> -TH | 71.90                     | 28.10           | 0.39                             |
| InVO <sub>4</sub> -JH | 67.01                     | 32.99           | 0.49                             |

## References:

- [1] Kresse, G.; Furthmüller, J. Efficiency of Ab-Initio Total Energy Calculations for Metals and Semiconductors Using A Plane-Wave Basis Set. *Comp. Mater. Sci.* 1996, 6, 15-50. [J].
- [2] Kresse, G.; Furthmüller, J. Efficient Iterative Schemes for Ab Initio Total-Energy Calculations Using A Plane-Wave Basis Set. *Phys. Rev. B* 1996, 54, 11169. [J].
- [3] Perdew, J. P.; Burke, K.; Ernzerhof, M. Phys. Generalized Gradient Approximation Made Simple. *Rev. Lett.* 1996, 77, 3865-3868. [J].
